# Supplementary material for: Prevention of Avian Retrovirus Infection in Chickens Using CRISPR-Cas9 Delivered by Marek’s Disease Virus
Source: PubMed Central journal article supplement — Mol Ther Nucleic Acids. 2020 Jun 12;21:343–53. doi: 10.1016/j.omtn.2020.06.009 (PMC7340974; doi:10.1016/j.omtn.2020.06.009), 2020-06-12
Supplement: mmc1.pdf [file mmc1.pdf]

**OMTN, Volume 21**

**Supplemental Information**

**Prevention of Avian Retrovirus Infection**

**in Chickens Using CRISPR-Cas9**

**Delivered by Marek's Disease Virus**

**Kai Li, Yongzhen Liu, Zengkun Xu, Yu Zhang, Yongxiu Yao, Venugopal Nair, Changjun Liu, Yanping Zhang, Yulong Gao, Xiaole Qi, Hongyu Cui, Li Gao, and Xiaomei Wang**

**Figure S1**

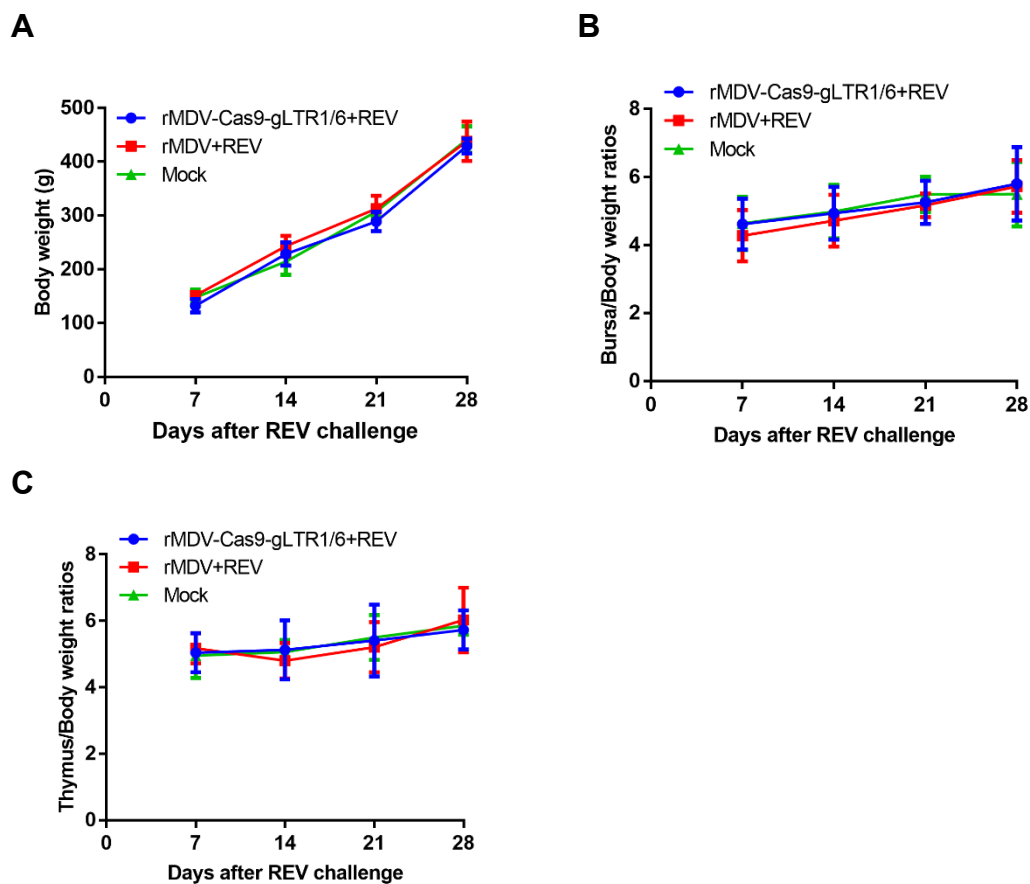

**Figure S1. Detection of clinical signs of chickens inoculated with recombinant MDV expression gRNAs/Cas9 after the REV challenge**

One-day-old chicks were first inoculated with rMDV-Cas9-gLTR1/6 or the parental MDV (rMDV), and then challenged with the REV HLJR0901 strain at 8 days of age.

The body weights (A), bursa/body (B), and thymus/body (C) weight ratios were monitored after the REV challenge.

**Table S1. Selected sgRNAs targeting REV**

| Name   | Position in REV    | Target sequence + PAM <sup>a</sup> | Orientation |
|--------|--------------------|------------------------------------|-------------|
| gLTR1  | 25-47, 7766-7788   | ATGTGGGAGGGAGCTCCGGGGGG            | +           |
| gLTR2  | 36-58, 7777-7799   | AGCTCCGGGGGGAATAGCGCTGG            | +           |
| gLTR3  | 107-129, 7848-7870 | <u>CCGCCATTGTACTTGATATATTT</u>     | -           |
| gLTR4  | 145-167, 7886-7908 | TCGGAATCGGCATCAAGAGC <u>AGG</u>    | +           |
| gLTR5  | 343-365, 8084-8106 | CCAGGTGCATCTCTTGCTCGGGG            | +           |
| gLTR6  | 369-391, 8110-8132 | <u>CCGTCCTACACATTGTTGTGACG</u>     | -           |
| gLTR7  | 373-395, 8114-8136 | <u>CCTACACATTGTTGTGACGTGCG</u>     | -           |
| gLTR8  | 374-396, 8115-8137 | CTACACATTGTTGTGACGTG <u>CGG</u>    | +           |
| gLTR9  | 397-419, 8138-8160 | <u>CCCAGATTCGAATCTGTAATAAA</u>     | -           |
| gLTR10 | 425-447, 8166-8188 | TTTCTTCTATATCCTCAGAT <u>TGG</u>    | +           |
| gLTR11 | 472-494, 8213-8235 | GTGTTGGCTGGCCTACTGGG <u>TGG</u>    | +           |
| gLTR12 | 483-505, 8224-8246 | <u>CCTACTGGGTGGGGTAGGGATCC</u>     | -           |
| gLTR13 | 506-528, 8247-8269 | GGACTGAATCCGTAGTATTT <u>CGG</u>    | +           |
| gLTR14 | 515-537, 8256-8278 | <u>CCGTAGTATTTCCGTACAACATT</u>     | -           |
| gLTR15 | 521-543, 8262-8284 | TATTTCCGTACAACATTTGG <u>GGG</u>    | +           |
| gPBS1  | 577-599            | CCTACTGTTTCTTCGAACTCCGG            | -           |
| gPBS2  | 629-951            | CCTCGCGAGGGTTTGGGAGGATC            | -           |
| gPBS3  | 740-762            | CCGTCTCTAAGACGGTGATACTA            | -           |
| gPBS4  | 792-814            | CCTTGTTTGTTCGTCACCTGT              | -           |
| gPBS5  | 831-853            | ATTGGTGTACCCACACCGCGCGG            | +           |
| gPol1  | 2565-2587          | AGAATCTGTAGCAATTATCGGGG            | +           |
| gPol2  | 2755-2777          | CCCCCGAAATACGGACAGAAGG             | +           |
| gPol3  | 2903-2925          | CCCCGGGGTTGGCATCCACACAA            | -           |
| gPol4  | 3009-3031          | CCTGCGCGAAACTATTCGCAAAT            | -           |
| gPol5  | 3084-3106          | CCTCCCTGTGCGAAAGTCCGGCA            | -           |

<sup>a</sup> Protospacer adjacent motif (PAM) sequence is underlined.
